# Supplementary material for: Metabolomics Discovers Early-Response Metabolic Biomarkers that Can Predict Chronic Reproductive Fitness in Individual Daphnia magna
Source: MDPI journal article supplement (doi:10.3390/metabo8030042), 2018-07-23
Supplement: s1 [file s1]

## Supplementary Information

Metabolomics discovers *early-response* metabolic biomarkers that can predict *chronic* reproductive fitness in individual *Daphnia magna*

Nadine S. Taylor, Alex Gavin and Mark R. Viant

School of Biosciences, University of Birmingham, Edgbaston, Birmingham B15 2TT, UK

Correspondence: [m.viant@bham.ac.uk](mailto:m.viant@bham.ac.uk); Tel.: +44-121-414-2219

### Contents of this document:

|                                                                                                                                                                                                                                                                                                                                                |        |
|------------------------------------------------------------------------------------------------------------------------------------------------------------------------------------------------------------------------------------------------------------------------------------------------------------------------------------------------|--------|
| <b>Supplemental methods:</b><br>Determining of the <i>D. magna</i> neonatal LC <sub>50</sub> concentrations<br>Determining of dose range for chronic (21-day) <i>D. magna</i> exposure studies<br>Determining the effects of cadmium, 2,4-dinitrophenol (DNP) and propranolol on the metabolome of <i>D. magna</i> following an acute exposure | Page 2 |
| <b>Table S1</b><br>Summary of exposure concentrations for Cd, DNP and propranolol                                                                                                                                                                                                                                                              | Page 3 |
| <b>Supplemental methods:</b><br>Perturbation of the <i>D. magna</i> metabolome following exposure to cadmium, DNP and propranolol<br>Effect of reduced-food on the <i>D. magna</i> metabolome                                                                                                                                                  | Page 3 |
| <b>Table S2</b><br>Total number of peaks detected and the proportion of peaks that significantly changed intensity (FDR < 5%) between the control and high dose groups, following chronic exposure of <i>D. magna</i> to Cd, DNP and propranolol.                                                                                              | Page 3 |
| <b>Table S3.</b><br>Summary of p-values from t-tests of PC scores between exposed and reduced-food samples, for Cd, DNP and propranolol exposures                                                                                                                                                                                              | Page 4 |
| <b>Table S4.</b><br>Summary of the 49 metabolic features (or peaks) that constitute the <i>non</i> -chemical-specific metabolic biomarker signature                                                                                                                                                                                            | Page 5 |
| <b>Table S6.</b><br>Effects of chemical exposure on <i>Daphnia</i> glutathione levels.                                                                                                                                                                                                                                                         | Page 7 |

See also supplementary file:

#### **Table S5 Supplementary Information.xlsx**

Summary of all annotations for the 49 metabolic features (or peaks) that constitute the *non*-chemical-specific metabolic biomarker signature.

### **Determining the *D. magna* neonatal LC<sub>50</sub> concentrations**

A study previously published by our laboratory has reported the experimental LC<sub>50</sub> values for the chemicals used in this study [1]. Exposure conditions were as described, in brief, 24-hour acute toxicity studies were performed for each of the three chemicals (cadmium, 2,4-dinitrophenol (DNP) and propranolol) using groups of 30 neonates (<24 hours old) in 250 mL of clean media with no food or supplements provided during this exposure. Neonatal 24-hour LC<sub>50</sub> values were determined using PROBIT analysis (SPSS v16, Chicago) and the concentrations were 713.6 µg/L Cd (measured as Cd<sup>2+</sup> ions), 14.9 mg/L DNP and 13.8 mg/L propranolol.

### **Determining the dose range for chronic (21-day) *D. magna* exposure studies**

The preliminary 21-day exposures of *D. magna* to both DNP and propranolol determined that 10% of the neonatal LC<sub>50</sub> did not induce any mortality for the duration of the exposure. However, exposure to Cd did induce mortality at 10% of the neonatal LC<sub>50</sub> concentration, with 100% survival for the duration of a chronic 21-day study only occurring at 1% of the neonatal LC<sub>50</sub> (7 µg/L). It should be noted that subjective observations of the animals exposed to Cd showed them to be relatively immobile and pale in colour at the end of this period. This preliminary study determined the nominal concentrations to be used in the reported chronic study (Table S1).

### **Determining the effects of cadmium, 2,4-dinitrophenol (DNP) and propranolol on the metabolome of *D. magna* following an acute exposure**

A major objective of our previously reported toxicity study [1] was to discover the molecular perturbations to the metabolome of *D. magna* following a short term (24 hours) exposure. While the original study used both whole organism homogenates and haemolymph samples to assess the metabolome, only the data generated from the whole organism homogenate samples are used in the current study as they match the sample type used in the chronic toxicity experiment. The methods used in the original study are detailed in Taylor et al. 2011 [1], and a summary of the experimental conditions is provided below.

Daphniids were cultured as described in the current paper. For the toxicity exposures, third brood neonates (<24 hours old) were cultured until 14 days of age, and then individual daphniids were transferred to 250 mL clean media and exposed to the relevant toxicant for 24 hours, during which time no food or supplements were provided. The experimental design consisted of control animals (n = 10 individuals) and toxicant exposed animals (n = 10 for each of the three toxicants). All toxicants were solubilized in deionized water. The nominal exposure concentration for each of the four toxicants was standardized to 10% of the previously determined neonatal LC<sub>50</sub> (see above), effectively normalizing the exposure concentration to a biological effect; the concentrations were 71 µg/L Cd (measured as Cd<sup>2+</sup> ions), 1.5 mg/L DNP and 1.4 mg/L propranolol. Following the 24-hour exposure period, animals were captured and flash frozen in liquid nitrogen, as detailed in the current paper.

**Table S1.** Summary of exposure concentrations for Cd, DNP and propranolol (n=8 per concentration), as used in the chronic reproductive toxicity assays. Exposure concentrations are also presented in relation to the reported LC<sub>50</sub> values for each chemical.

| Chemical    | Nominal concentration | Percentage of neonatal LC <sub>50</sub><br>[1] |
|-------------|-----------------------|------------------------------------------------|
| Cadmium     | 0.35 µg/L             | 0.05%                                          |
|             | 1.4 µg/L              | 0.2%                                           |
|             | 3.5 µg/L              | 0.5%                                           |
|             | 7.0 µg/L              | 1%                                             |
| DNP         | 0.15 mg/L             | 1%                                             |
|             | 0.75 mg/L             | 5%                                             |
|             | 1.5 mg/L              | 10%                                            |
| Propranolol | 0.14 mg/L             | 1%                                             |
|             | 0.7 mg/L              | 5%                                             |
|             | 1.4 mg/L              | 10%                                            |

No mortality occurred during the 21-day exposure to propranolol. Some mortality occurred during the chronic exposures in both the Cd and DNP studies. Specifically, during the Cd exposure: 1 animal died in each of the 0 and 1.4 µg/L doses, 5 animals died at 3.5 µg/L, and 3 animals died at 7.0 µg/L. Due to the high levels of mortality in the Cd exposure, the 3.5 and 7.0 µg/L doses were subsequently grouped together as one ‘high’ dose for the analysis of reproductive output. During the DNP exposure, 1 animal died in each of the 0, 0.15 and 0.75 mg/L dose groups.

#### **Perturbation of the *D. magna* metabolome following exposure to cadmium, DNP and propranolol**

Table S2 summarises the total number of peaks observed in each of the three chemical exposure studies, along with the proportion of those peaks that changed intensity significantly in the high dose group relative to untreated controls (Student’s t-tests adjusted for FDR < 5%). Consistent with the PCA results presented in the main paper (Figure 2), for which little class separation was visible for DNP, the proportion of significant peaks in the DNP dataset is only 2.6% of the total number of peaks detected. The much higher proportion of significant peaks in both the Cd and propranolol datasets (59% and 44% respectively) is again consistent with the much more evident class separation seen in the corresponding PCA scores plots (Figure 2).

**Table S2.** Total number of peaks detected and the proportion of peaks that significantly changed intensity (FDR < 5%) between the control and high dose groups, following chronic exposure of *D. magna* to Cd, DNP and propranolol.

|                                            | Cd   | DNP  | Propranolol |
|--------------------------------------------|------|------|-------------|
| <b>Total number of peaks observed</b>      | 4056 | 4112 | 3647        |
| <b>Proportion of significant peaks (%)</b> | 59   | 2.6  | 44          |

It should be noted that the putative annotation of these peaks following data processing allowed for the identification of two peaks corresponding to DNP, specifically the [DNP-H]<sup>-</sup> and [DNP(<sup>13</sup>C)-H]<sup>-</sup> ion forms. Since these peaks arise from the parent chemical, they were removed from the dataset prior to any statistical analysis. Neither Cd nor propranolol was detected.

#### Effect of reduced-food on the *D. magna* metabolome

Statistical analysis of the PC scores data (from the PCAs of the metabolomics data, Figure 2) revealed that the reduced-food group was significantly different from the low, medium and high dose exposure groups, for each of the three chemicals in the study (t-tests with Bonferroni-corrected *p*-value < 0.0125).

**Table S3.** Summary of *p*-values from t-tests of PC scores between exposed and reduced-food samples, for Cd, DNP and propranolol exposures (data from Figure 2).

| Chemical    | Reduced food vs. dose group | <i>p</i> -value       | PC scores |
|-------------|-----------------------------|-----------------------|-----------|
| Cadmium     | High dose                   | $1.5 \times 10^{-13}$ | PC1       |
|             | Low/Medium dose             | $3.3 \times 10^{-4}$  | PC2       |
| DNP         | Low/Medium/High             | $6.0 \times 10^{-7}$  | PC1       |
| Propranolol | Medium/High                 | $1.1 \times 10^{-15}$ | PC1       |
|             | Low                         | $3.1 \times 10^{-12}$ | PC2       |

**Table S4.** Summary of the 49 metabolic features (or peaks) that constitute the *non*-chemical-specific metabolic biomarker signature. The peaks are ranked in order of importance according to the forward selected PLS-R model. Also included in the table are the *m/z* values, average intensities and the fold-change in intensities between the high dose and control groups for each of the three chemical exposure datasets.

| Rank order of peak importance in PLS-R model | Cd                  |                   |                                   | DNP                 |                   |                                   | Propranolol         |                   |                                   |
|----------------------------------------------|---------------------|-------------------|-----------------------------------|---------------------|-------------------|-----------------------------------|---------------------|-------------------|-----------------------------------|
|                                              | Measured <i>m/z</i> | Average intensity | Fold change (high dose / control) | Measured <i>m/z</i> | Average intensity | Fold change (high dose / control) | Measured <i>m/z</i> | Average intensity | Fold change (high dose / control) |
| 1                                            | 441.17272           | 3.94E+04          | 0.534                             | 441.17270           | 8.26E+04          | 0.722                             | 441.17276           | 5.49E+04          | 1.011                             |
| 2                                            | 228.04585           | 3.49E+04          | 1.670                             | 228.04763           | 1.98E+05          | 1.554                             | 228.04755           | 2.56E+05          | 0.074                             |
| 3                                            | 215.03828           | 2.72E+05          | 2.456                             | 215.03834           | 8.23E+04          | 1.776                             | 215.03830           | 8.76E+04          | 0.489                             |
| 4                                            | 326.11080           | 2.42E+05          | 5.059                             | 326.11079           | 1.09E+05          | 1.474                             | 326.11073           | 2.97E+05          | 5.984                             |
| 5                                            | 175.02481           | 2.86E+04          | 0.498                             | 175.02480           | 3.15E+04          | 0.636                             | 175.02482           | 2.86E+04          | 0.571                             |
| 6                                            | 258.10637           | 2.97E+04          | 4.092                             | 258.10642           | 1.57E+05          | 0.518                             | 258.10635           | 3.12E+04          | 1.049                             |
| 7                                            | 441.01832           | 6.80E+04          | 26.168                            | 441.01813           | 2.05E+04          | 0.987                             | 441.01816           | 4.02E+04          | 5.705                             |
| 8                                            | 274.03900           | 3.01E+04          | 1.062                             | 274.03899           | 5.46E+04          | 0.370                             | 274.03899           | 7.39E+04          | 0.519                             |
| 9                                            | 263.13221           | 5.00E+05          | 1.853                             | 263.13227           | 3.32E+05          | 2.099                             | 263.13221           | 5.06E+05          | 2.898                             |
| 10                                           | 478.98683           | 1.28E+05          | 21.172                            | 478.98670           | 3.49E+04          | 0.780                             | 478.98663           | 9.63E+04          | 5.874                             |
| 11                                           | 310.11436           | 6.95E+04          | 0.527                             | 310.11427           | 2.10E+05          | 0.309                             | 310.11436           | 5.05E+05          | 0.407                             |
| 12                                           | 396.98317           | 2.08E+05          | 16.046                            | 396.98290           | 6.76E+04          | 0.907                             | 396.98310           | 1.49E+05          | 4.722                             |
| 13                                           | 257.10302           | 2.24E+05          | 4.155                             | 257.10306           | 9.00E+05          | 0.537                             | 257.10301           | 1.88E+05          | 0.917                             |
| 14                                           | 309.03348           | 5.77E+04          | 0.248                             | 309.03341           | 1.31E+05          | 1.089                             | 309.03350           | 6.06E+04          | 0.450                             |
| 15                                           | 401.99766           | 1.74E+04          | 0.468                             | 401.99750           | 1.74E+04          | 1.433                             | 401.99751           | 1.09E+04          | 0.404                             |
| 16                                           | 237.99438           | 1.32E+05          | 1.354                             | 237.99446           | 2.85E+05          | 0.386                             | 237.99440           | 1.60E+05          | 7.225                             |
| 17                                           | 295.12201           | 2.86E+04          | 0.428                             | 295.12191           | 3.31E+04          | 0.606                             | 295.12202           | 5.66E+04          | 0.307                             |
| 18                                           | 310.96619           | 5.60E+04          | 0.187                             | 310.96615           | 7.81E+04          | 0.976                             | 310.96630           | 5.56E+04          | 0.382                             |
| 19                                           | 310.11747           | 2.77E+04          | 0.614                             | 310.11735           | 8.04E+04          | 0.236                             | 310.11741           | 2.29E+05          | 0.237                             |
| 20                                           | 392.96926           | 4.06E+04          | 0.128                             | 392.96904           | 4.23E+04          | 1.045                             | 392.96899           | 2.89E+04          | 0.204                             |
| 21                                           | 355.12463           | 2.19E+04          | 2.308                             | 355.12469           | 3.87E+04          | 3.250                             | 355.12465           | 5.15E+04          | 9.007                             |
| 22                                           | 474.97252           | 2.43E+04          | 0.182                             | 474.97227           | 2.82E+04          | 1.030                             | 474.97212           | 1.86E+04          | 0.209                             |
| 23                                           | 242.01531           | 3.24E+04          | 0.607                             | 242.01539           | 1.02E+05          | 2.014                             | 242.01532           | 6.55E+04          | 1.145                             |

|    |           |          |        |           |          |       |           |          |       |
|----|-----------|----------|--------|-----------|----------|-------|-----------|----------|-------|
| 24 | 331.05933 | 1.85E+04 | 0.141  | 331.05934 | 1.83E+04 | 0.313 | 331.05929 | 1.11E+04 | 0.342 |
| 25 | 252.13555 | 5.42E+05 | 0.355  | 252.13562 | 6.72E+05 | 0.635 | 252.13557 | 2.40E+05 | 0.373 |
| 26 | 251.09578 | 3.11E+05 | 0.503  | 251.09579 | 2.98E+05 | 1.163 | 251.09574 | 5.96E+05 | 0.188 |
| 27 | 295.99254 | 1.64E+04 | 0.438  | 295.99254 | 1.85E+04 | 0.974 | 295.99264 | 1.46E+04 | 0.383 |
| 28 | 425.13040 | 3.42E+04 | 1.722  | 425.13033 | 6.69E+04 | 3.164 | 425.13032 | 7.77E+04 | 8.740 |
| 29 | 287.01825 | 8.77E+03 | 2.114  | 287.01810 | 3.35E+04 | 1.531 | 287.01813 | 2.72E+04 | 0.877 |
| 30 | 372.10751 | 3.17E+04 | 0.186  | 372.10738 | 5.94E+04 | 0.832 | 372.10739 | 2.63E+04 | 0.211 |
| 31 | 243.00905 | 1.20E+05 | 0.616  | 243.00911 | 3.80E+05 | 2.266 | 243.00905 | 2.51E+05 | 1.313 |
| 32 | 458.99866 | 3.22E+04 | 0.577  | 458.99847 | 4.38E+04 | 0.938 | 458.99847 | 3.86E+04 | 0.418 |
| 33 | 454.94205 | 2.98E+04 | 17.413 | 454.94193 | 1.22E+04 | 0.782 | 454.94190 | 3.01E+04 | 4.776 |
| 34 | 400.14608 | 2.18E+04 | 20.737 | 400.14602 | 1.65E+04 | 2.146 | 400.14625 | 4.16E+04 | 7.558 |
| 35 | 247.06182 | 4.26E+04 | 3.585  | 247.06191 | 1.57E+05 | 1.982 | 247.06185 | 2.06E+05 | 1.681 |
| 36 | 457.20404 | 3.67E+04 | 1.172  | 457.20380 | 6.42E+04 | 3.858 | 457.20396 | 1.34E+05 | 9.648 |
| 37 | 372.11548 | 1.78E+04 | 0.454  | 372.11494 | 1.13E+04 | 0.689 | 372.11549 | 4.24E+04 | 0.220 |
| 38 | 359.16755 | 8.34E+03 | 3.428  | 359.16749 | 1.95E+04 | 0.999 | 359.16752 | 1.03E+04 | 0.545 |
| 39 | 391.01843 | 9.97E+03 | 0.616  | 391.01877 | 1.19E+04 | 0.638 | 391.01834 | 1.33E+04 | 0.710 |
| 40 | 443.14090 | 4.50E+04 | 1.863  | 443.14059 | 7.89E+04 | 2.445 | 443.14080 | 1.11E+05 | 6.254 |
| 41 | 294.99218 | 1.62E+05 | 0.214  | 294.99208 | 1.78E+05 | 0.956 | 294.99217 | 1.36E+05 | 0.424 |
| 42 | 282.95769 | 4.03E+04 | 0.754  | 282.95765 | 3.03E+04 | 0.538 | 282.95758 | 2.97E+04 | 0.739 |
| 43 | 258.05639 | 7.84E+04 | 0.931  | 258.05642 | 1.11E+05 | 0.307 | 258.05634 | 2.71E+05 | 0.668 |
| 44 | 340.12478 | 1.68E+04 | 11.993 | 340.12479 | 1.77E+04 | 2.248 | 340.12493 | 2.62E+04 | 5.284 |
| 45 | 464.97106 | 1.79E+04 | 12.919 | 464.97088 | 9.90E+03 | 0.792 | 464.97086 | 1.73E+04 | 3.425 |
| 46 | 404.04780 | 4.33E+04 | 0.779  | 404.04758 | 4.37E+04 | 1.121 | 404.04770 | 3.20E+04 | 0.863 |
| 47 | 352.04448 | 3.09E+04 | 0.670  | 352.04440 | 2.76E+04 | 1.473 | 352.04435 | 1.33E+04 | 0.890 |
| 48 | 421.00589 | 3.81E+04 | 1.084  | 421.00562 | 3.36E+04 | 1.362 | 421.00562 | 2.76E+04 | 1.519 |
| 49 | 415.14615 | 5.41E+04 | 1.193  | 415.14588 | 8.35E+04 | 1.737 | 415.14590 | 1.41E+05 | 2.582 |

**Table S6.** Effects of chemical exposure on *Daphnia* glutathione levels.

|             | Ion form   | Measured <i>m/z</i> | <i>m/z</i> error (ppm) | Fold change (high dose / control) |
|-------------|------------|---------------------|------------------------|-----------------------------------|
| Cd          | [M-H]-     | 306.0765            | -0.11                  | 0.603                             |
|             | [M+Na-2H]- | 328.05856           | 0.25                   | 0.649                             |
|             | [M+Cl]-    | 342.05321           | 0.00                   | 0.703                             |
|             |            |                     |                        | <b>Average = 0.652</b>            |
| DNP         | [M-H]-     | 306.07641           | -0.4                   | 1.512                             |
|             | [M+Na-2H]- | 328.05849           | 0.04                   | 1.592                             |
|             | [M+Cl]-    | 342.0532            | -0.03                  | 1.543                             |
|             |            |                     |                        | <b>Average = 1.549</b>            |
| Propranolol | [M-H]-     | 306.07652           | -0.04                  | 0.865                             |
|             | [M+Na-2H]- | 328.05851           | 0.1                    | 1.073                             |
|             | [M+Cl]-    | Not observed        | -                      | -                                 |
|             |            |                     |                        | <b>Average = 0.969</b>            |

## References

- [1] Taylor, N.S.; Weber, R.J.M.; White, T.A.; Viant, M.R. Discriminating between different acute chemical toxicities via changes in the daphnid metabolome. *Toxicol. Sci.* **2010**, *118*, 307-317.
- [2] Southam, A.D.; Payne, T.G.; Cooper, H.J.; Arvanitis, T.N.; Viant, M.R. Dynamic Range and Mass Accuracy of Wide-Scan Direct Infusion Nanoelectrospray Fourier Transform Ion Cyclotron Resonance Mass Spectrometry-Based Metabolomics Increased by the Spectral Stitching Method. *Anal. Chem.* **2007**, *79*, 4595-4602.
