# Supplementary material for: Metabolomics Discovers Early-Response Metabolic Biomarkers that Can Predict Chronic Reproductive Fitness in Individual Daphnia magna
Source: Metabolites. 2018 Jul 23;8(3):42. doi: 10.3390/metabo8030042 (PMC6160912; doi:10.3390/metabo8030042)
Supplement: Supplementary file 1 [file metabolites-08-00042-s001.zip › Table S5 Supplementary Information.xlsx]

## Sheet: TABLE S5
Table S5. Summary of all annotations for the 49 metabolic features (or peaks) that constitute the non-chemical-specific metabolic biomarker signature.
Rank order of peak importance in PLS-R model	Measured m/z	Intensity correlation within 49 biomarkers?	No. empirical formulae (MI-Pack output)	No. empirical formulae (after applying rules manually)	Empirical formulae	Ion form	m/z error (ppm)	Supporting peak annotations (other adducts or isotopes)	Putative metabolite annotation(s)	Metabolite identification (using MS/MS fragmentation)
1	441.173		3	2	C20H38O2S3	[M+Cl]-	-0.22	C19(13C)H38O2S3 [M+Cl]- (m/z 442.17597, m/z error=-0.41 ppm), [M+(37Cl)]- (m/z 443.16964, m/z error=-0.47 ppm)
					C22H27N6P	[M+Cl]-	-0.42	C21(13C)H27N6P [M+Cl]- (m/z 442.17597, m/z error=-0.61 ppm), [M+(37Cl)]- (m/z 443.16964, m/z error=-0.66 ppm)
2	228.048		3	3	C7H12N5PS	[M-H]-	-0.87
					C6H18NO2P3	[M-H]-	-0.6
					C4H5N11	[M+Na-2H]-	0.1
3	215.038		2	2	C9H12O4S	[M-H]-	-0.07
					C12H8N2	[M+Cl]-	0.89
4	326.111		6	5	C8H13N13	[M+Cl]-	-0.92	[M+K-2H]- (m/z 328.08984, m/z error=-1.38 ppm)
					C14H24N3P3	[M-H]-	-0.75
					C13H29NS4	[M-H]-	-0.68
					C7H14N13OP	[M-H]-	-0.38
					C12H17N5O6	[M-H]-	0.56
5	175.025		1	1	C6H8O6	[M-H]-	-0.08	[M+Na-2H]- (m/z 197.00675, m/z error=-0.04 ppm), [M+Cl]- (m/z 211.00136, m/z error=-0.62 ppm)	4,6-Dihydroxy-2,5-dioxohexanoate, 2-Hydroxy-3-oxoadipate, Dehydro-4-deoxyglucuronate, Ascorbate, D-Glucuronolactone, Xylo-Hexulonolactone	Ascorbate (compared to authentic chemical standard)
6	258.106	r=0.996 (m/z 257.10306)	2	1	C11(13C)H18O6	[M-H]-	0.01
7	441.018	r=0.949 (m/z 396.98290), r=0.914 (m/z 454.94193), r=0.959 (m/z 464.97088), r=0.974 (m/z 478.98670)	112	112	-	-	-
8	274.039		5	3	C10H13NO6S	[M-H]-	-0.35
					C5H18N5PS3	[M-H]-	0.25
					C13H9N3O2	[M+Cl]-	0.41
9	263.132		2	1	C12H24O4S	[M-H]-	0.05		Sulfonated lipid, measured previously in our laboratory	MS/MS fragmentation confirmed presence of sulfate group (no commercial standard available)
10	478.987	r=0.985 (m/z 396.98290), r=0.974 (m/z 441.01813), r=0.974 (m/z 454.94193), r=0.978 (m/z 464.97088)	195	195	-	-	-
11	310.114	r=0.902 (m/z 258.05642)	3	2	C11H21NO9	[M-H]-	-0.28
					C11H23N5S2	[M+Na-2H]-	0.36
12	396.983	r=0.949 (m/z 441.01813), r=0.971 (m/z 454.94193), r=0.939 (m/z 464.97088), r=0.985 (m/z 478.98670)	80	80	-	-	-
13	257.103	r=0.996 (m/z 258.10642)	1	1	C12H18O6	[M-H]-	-0.01
14	309.033		13	13	-	-	-
15	401.998		65	65	-	-	-
16	237.994		7	5	C6H10NO5PS	[M-H]-	0.01
					C7H9NO4S	[M+Cl]-	-0.73
					C9H6N3OP	[M+Cl]-	0.88
					C11H7NO2S	[M+Na-2H]-	0.17
					C3H3N7O5	[M+Na-2H]-	0.94
17	295.122		7	1	C12H24O6S	[M-H]-	-0.6	[M+Na-2H]- (m/z 317.10402, m/z error=-0.03 ppm), [M+K-2H]- (m/z 333.07797, m/z error=0.00 ppm)	Sulfonated lipid, measured previously in our laboratory	MS/MS fragmentation confirmed presence of sulfate group (no commercial standard available)
18	310.966		22	22
19	310.117		7	2	C11H21N3O5	[M+Cl]-	-0.56		Glutamyl-lysine	Unsuccessful
					C15H19N3O3	[M+Na-2H]-	0.13
20	392.969	r=0.951 (m/z 294.99208), r=0.966 (m/z 474.97227)	72	72	-	-	-
21	355.125	r=0.980 (m/z 425.13033), r=0.970 (m/z 443.14059)	14	14	-	-	-
22	474.972	r=0.951 (m/z 294.99208), r=0.966 (m/z 392.96904)	197	197	-	-	-
23	242.015	r=0.970 (m/z 243.00911)	9	1	C6(13C)H10O7	[M+Cl]-	-0.09	C7H10O7 [M-H]- (m/z 205.03538, m/z error=0.01 ppm), C6(13C)H10O7 [M-H]- (m/z 206.03874, m/z error=0.03 ppm), C7H10O7 [M+Cl]- (m/z 241.01205, m/z error=-0.03 ppm), C7H10O7 [M+(37Cl)]- (m/z 243.00911, m/z error=0.01 ppm)	3-Hydroxybutane-1,2,3-tricarboxylate, 2-Hydroxybutane-1,2,4-tricarboxylate, 2-Methylcitrate, Homoisocitrate	Unsuccessful
24	331.059		22	22	-	-	-
25	252.136		1	1	C10(13C)H24O4S	[M-H]-	0.04	C11H24O4S [M-H]- (m/z 251.13225, m/z error=-0.02 ppm)	Sulfonated lipid, measured previously in our laboratory	MS/MS fragmentation confirmed presence of sulfate group (no commercial standard available)
26	251.096		3	2	C10H20O5S	[M-H]-	-0.32		Sulfonated lipid, measured previously in our laboratory	MS/MS fragmentation confirmed presence of sulfate group (no commercial standard available)
27	295.993		16	16	-	-	-
28	425.13	r=0.980 (m/z 355.12469), r=0.979 (m/z 443.14059)	41	41	-	-	-
29	287.018		15	15	-	-	-
30	372.107		21	21	-	-	-
31	243.009	r=0.970 (m/z 242.01539)	2	1	C7H10O7	[M+(37Cl)]-	0.01	[M-H]- (m/z 205.03538, m/z error=0.01 ppm), C6(13C)H10O7 [M-H]- (m/z 206.03874, m/z error=0.03 ppm), [M+Cl]- (m/z 241.01205, m/z error=-0.03 ppm), C6(13C)H10O7 [M+Cl]- (m/z 242.01539, m/z error=-0.09 ppm)	3-Hydroxybutane-1,2,3-tricarboxylate, 2-Hydroxybutane-1,2,4-tricarboxylate, 2-Methylcitrate, Homoisocitrate	Unsuccessful
32	458.998		146	146	-	-	-
33	454.942	r=0.971 (m/z 396.98290), r=0.914 (m/z 441.01813), r=0.943 (m/z 464.97088), r=0.974 (m/z 478.98670)	162	162	-	-	-
34	400.146	r=0.989 (m/z 340.12479)	19	19	-	-	-
35	247.062		6	2	C6H17N2O4P	[M+Cl]-	-0.35	[M+(37Cl)]- (m/z 249.05915, m/z error=0.41 ppm)
					C10H15N2O2P	[M+Na-2H]-	0.51
36	457.204		9	7	C22H32N6OP2	[M-H]-	-0.46
					C23H31N6P	[M+Cl]-	-0.84	C22(13C)H31N6P [M+Cl]- (m/z 458.20722, m/z error=-0.70 ppm)
					C20H43O3PS3	[M-H]-	-0.27	C19(13C)H43O3PS3 [M-H]- (m/z 458.20722, m/z error=-0.13 ppm),
					C21H42O2S3	[M+Cl]-	-0.65	C20(13C)H42O2S3 [M+Cl]- (m/z 458.20722, m/z error=-0.51 ppm)
					C25H40S3	[M+Na-2H]-	-0.19	C24(13C)H40S3 [M+Na-2H]- (m/z 458.20722, m/z error=-0.04 ppm)
					C30H26N4O	[M-H]-	0.91
					C22H40N2P2S2	[M-H]-	0.57	C21(13C)H40N2P2S2 [M-H]- (m/z 458.20722, m/z error=0.71 ppm)
37	372.115		17	17	-	-	-
38	359.167		13	13	-	-	-
39	391.019		12	12	-	-	-
40	443.141	r=0.970 (m/z 355.12469), r=0.979 (m/z 425.13033)	10	10	C5H22N14O8	[M+(37Cl)]-	-0.83
					C7H29N12O2PS2	[M+Cl]-	-0.82
					C22H25N4O2P	[M+Cl]-	-0.73
					C22H33OP3	[M+(37Cl)]-	-0.66
					C15H23N10O2P	[M+(37Cl)]-	-0.38
					C8H32N10OP4	[M+Cl]-	0.18
					C20H26N2O7	[M+(37Cl)]-	0.31
					C22H33OPS2	[M+Cl]-	0.32
					C15H31N6OPS2	[M+(37Cl)]-	0.67
					C14H29N6O4PS	[M+Cl]-	0.73
41	294.992	r=0.951 (m/z 392.96904), r=0.951 (m/z 474.97227)	13	13	-	-	-
42	282.958		23	23	-	-	-
43	258.056	r=0.902 (m/z 310.11436)	2	1	C8H15NO6	[M+(37Cl)]-	0.11	[M-H]- (m/z 220.08268, m/z error=0.08 ppm), [M+Cl]- (m/z 256.05935, m/z error=0.04 ppm), [M+K-2H]- (m/z 258.03844, m/z error=-0.41 ppm)	N-Acetyl-D-galactosamine, N-Acetyl-D-glucosamine, Acetyl-D-mannosamine	Unsuccessful
44	340.125	r=0.989 (m/z 400.14602)	6	5	C12H23NO10	[M-H]-	-0.39
					C10H11N15	[M-H]-	-0.35
					C12H25N5OS2	[M+Na-2H]-	0.2
					C10H24N7PS	[M+Cl]-	0.69
					C4H21N11O4S	[M+Na-2H]-	0.74
45	464.971	r=0.939 (m/z 396.98290), r=0.959 (m/z 441.01813), r=0.943 (m/z 454.94193), r=0.978 (m/z 478.9867)	175	175	-	-	-
46	404.048		60	60	-	-	-
47	352.044		16	16	-	-	-
48	421.006		90	90	-	-	-
49	415.146		4	1	C14H23N10OP	[M+(37Cl)]-	0.09	[M-H]- (m/z 377.17266, m/z error=1.44 ppm), [M+Cl]- (m/z 413.14865, m/z error=-0.35 ppm), C13(13C)H23N10OP [M+(37Cl)]- (m/z 416.14882, m/z error=-0.91 ppm), C13(13C)H23N10OP [M+Cl]- (m/z 414.15214, m/z error=-0.02 ppm), C13(13C)H23N10OP [M+(37Cl)]- (m/z 416.14882, m/z error=-0.91 ppm)
The table includes the measured m/z values, selected correlations between the intensities of pairs of peaks (only for annotations with r > 0.9), empirical formula(e) (only for annotations with ≤10 formulae), ion form, m/z error compared to the theoretical mass (ppm), the observation of related adduct forms and naturally-occurring isotopes to support the peak annotations, and where known the metab…
